# Supplementary material for: Six-gene Signature Based on Metabolism Is Closely Related to the Prognosis and Immune Infiltration of Patients With Sepsis
Source: Research Square preprint supplement (doi:10.21203/rs.3.rs-154347/v1), 2021-01-29
Supplement: Supplementary file 1 [file c0c85a52c565d0d9fc6a302b.xlsx]

## Sheet: KEGG
ID	Description		setSize	enrichmentScore	NES	pvalue	p.adjust	qvalues	rank	leading_edge	core_enrichment
KEGG NATURAL KILLER CELL MEDIATED CYTOTOXICITY	KEGG NATURAL KILLER CELL MEDIATED CYTOTOXICITY	KEGG自然杀伤细胞介导的细胞毒性	98	-0.621815	-2.49325	1e-10	8.7e-09	6.31579e-09	2368	tags=61%, list=23%, signal=47%	100507436/5880/3460/3383/5595/3802/5335/2885/637/6654/7305/3107/5295/4772/5293/3459/4068/3689/3384/6452/3133/27040/3455/23533/5777/6655/7535/10725/51744/5530/3937/5294/5533/10451/5579/2215/3823/5058/117157/5336/3454/8743/9437/3683/5894/7409/962/8795/4775/3821/2214/8794/2534/3824/919/4773/3932/5551/22914/3002
KEGG T CELL RECEPTOR SIGNALING PATHWAY	KEGG T CELL RECEPTOR SIGNALING PATHWAY	KEGG T细胞受体信号通路	95	-0.613378	-2.4445	1e-10	8.7e-09	6.31579e-09	2038	tags=51%, list=20%, signal=41%	5335/2885/10892/8915/207/6654/2353/4690/5295/5970/4772/5293/5170/5062/3551/4790/867/27040/5788/23533/5777/6655/2932/7535/10725/5530/1432/3937/5294/5533/10451/5058/5894/7409/10125/5588/868/916/4775/926/2534/919/4773/915/925/917/3702/3932
KEGG LEISHMANIA INFECTION	KEGG LEISHMANIA INFECTION	KEGG利什曼虫感染	60	-0.650252	-2.37111	1.03575e-09	6.00735e-08	4.36105e-08	2420	tags=68%, list=24%, signal=52%	51135/6885/5743/3460/1535/5595/7040/2353/5970/3684/7189/3459/653361/3119/3689/7099/4615/2212/4790/4688/4689/5777/2209/1432/3109/7097/6772/5579/2215/3716/1378/3122/3127/3108/3117/3125/3115/2214/3113/3123/3553
KEGG GRAFT VERSUS HOST DISEASE	KEGG GRAFT VERSUS HOST DISEASE	移植物抗宿主病	31	-0.735388	-2.35099	1.23041e-08	5.35229e-07	3.88551e-07	321	tags=48%, list=3%, signal=47%	3109/3134/3122/3127/3108/3821/3117/3125/3115/3113/3123/3553/3824/5551/3002
KEGG CYTOKINE CYTOKINE RECEPTOR INTERACTION	KEGG CYTOKINE CYTOKINE RECEPTOR INTERACTION	细胞因子受体相互作用	131	-0.492904	-2.06463	9.94547e-08	3.46102e-06	2.51254e-06	1298	tags=32%, list=13%, signal=28%	8718/2323/944/7048/8764/3597/729230/1438/3455/3604/3561/7132/1232/3588/7133/939/23765/1234/3566/1441/3454/4050/80301/8743/3570/3587/8795/8740/6375/1230/10673/3577/3579/6352/8794/3553/51561/1236/6351/3560/1524/3575
KEGG CHEMOKINE SIGNALING PATHWAY	KEGG CHEMOKINE SIGNALING PATHWAY	KEGG趋化因子信号通路	127	-0.49147	-2.04448	3.68648e-07	1.06908e-05	7.76101e-06	1862	tags=39%, list=18%, signal=32%	207/6654/5295/5970/5293/653361/643/6774/2773/3551/4790/1398/1794/5567/729230/408/23533/6655/5590/2932/5580/113/1232/3055/4067/5294/10451/6772/1234/5579/9475/5058/10235/6777/5894/1445/7409/5829/7074/57580/6375/1230/3577/3579/6352/1236/3702/6351/1524
KEGG ANTIGEN PROCESSING AND PRESENTATION	KEGG ANTIGEN PROCESSING AND PRESENTATION	KEGG抗原的处理和呈递	57	-0.599541	-2.16816	6.16811e-07	1.53322e-05	1.11304e-05	2253	tags=54%, list=22%, signal=43%	5993/1385/3802/3305/5721/3312/3107/3119/10437/3133/6892/1520/3109/3823/6890/3134/6891/3122/3127/972/926/3108/3821/3117/3310/3125/3115/3113/3123/3824/925
KEGG JAK STAT SIGNALING PATHWAY	KEGG JAK STAT SIGNALING PATHWAY	KEGG JAK STAT信号通路	88	-0.528551	-2.08096	9.09823e-07	1.83573e-05	1.33265e-05	1862	tags=43%, list=18%, signal=36%	207/6654/1439/5295/10254/5293/3459/6774/867/1387/3597/1438/3455/23533/5777/7297/6655/3561/2033/6776/3588/5294/6772/3566/1441/3716/3454/4609/8554/6777/3570/10379/3587/868/6775/51561/3560/3575
KEGG TYPE I DIABETES MELLITUS	KEGG TYPE I DIABETES MELLITUS	KEGG型糖尿病	30	-0.703974	-2.24548	9.49514e-07	1.83573e-05	1.33265e-05	624	tags=43%, list=6%, signal=41%	3109/3134/3122/3127/3108/3117/3125/3115/3113/3123/3553/5551/3002
KEGG ALLOGRAFT REJECTION	KEGG ALLOGRAFT REJECTION	KEGG同种异体移植物排斥反应	28	-0.709796	-2.21377	1.78947e-06	3.11368e-05	2.26038e-05	624	tags=43%, list=6%, signal=40%	3109/3134/3122/3127/3108/3117/3125/3115/3113/3123/5551/3002
KEGG AUTOIMMUNE THYROID DISEASE	KEGG AUTOIMMUNE THYROID DISEASE	KEGG自身免疫性甲状腺疾病	28	-0.705295	-2.19973	2.18399e-06	3.3562e-05	2.43644e-05	624	tags=43%, list=6%, signal=40%	3109/3134/3122/3127/3108/3117/3125/3115/3113/3123/5551/3002
KEGG B CELL RECEPTOR SIGNALING PATHWAY	KEGG B CELL RECEPTOR SIGNALING PATHWAY	KEGG B细胞受体信号通路	70	-0.548827	-2.07581	2.44595e-06	3.3562e-05	2.43644e-05	2351	tags=54%, list=23%, signal=42%	84433/5880/8519/5595/2885/10892/695/8915/207/6654/2353/27071/5295/5970/933/4772/5293/3551/971/4790/23533/5777/6655/2932/10725/5530/4067/5294/5533/10451/5579/5336/2213/5894/7409/4775/975/4773
KEGG PRIMARY IMMUNODEFICIENCY	KEGG PRIMARY IMMUNODEFICIENCY	KEGG原发性免疫缺陷	29	-0.684121	-2.14945	2.50751e-06	3.3562e-05	2.43644e-05	1092	tags=45%, list=11%, signal=40%	5788/64421/3561/7535/6890/100/6891/916/926/915/925/3932/3575
KEGG VIRAL MYOCARDITIS	KEGG VIRAL MYOCARDITIS	KEGG病毒性心肌炎	47	-0.594692	-2.06423	7.26176e-06	9.02534e-05	6.55197e-05	2325	tags=55%, list=23%, signal=43%	5880/1604/3383/4627/1982/637/3107/1525/3119/3689/3133/841/3109/27/3683/3134/3122/3127/3108/3117/3125/3115/3113/2534/3123/5551
KEGG TOLL LIKE RECEPTOR SIGNALING PATHWAY	KEGG TOLL LIKE RECEPTOR SIGNALING PATHWAY	KEGG TOLL样受体信号通路	75	-0.515975	-1.97788	1.13485e-05	0.000131643	9.55665e-05	3219	tags=57%, list=32%, signal=39%	5603/8737/1147/958/29110/4792/51284/5290/942/5608/51135/6885/114609/5595/207/2353/5295/5970/7189/5293/353376/23643/7099/4615/3551/10333/4790/3455/23533/841/3665/1432/51311/5294/7097/7096/6772/3454/929/7100/6352/3553/6351
KEGG HEMATOPOIETIC CELL LINEAGE	KEGG HEMATOPOIETIC CELL LINEAGE	KEGG造血细胞系	64	-0.531336	-1.95888	2.93526e-05	0.00031921	0.000231731	1046	tags=41%, list=10%, signal=37%	1438/960/951/2209/912/3566/4311/1441/929/3570/290/1378/3122/3127/916/931/926/921/3125/3123/3553/915/925/917/3575/914
KEGG CELL CYCLE	KEGG CELL CYCLE	KEGG细胞周期	100	0.459862	1.95068	3.44558e-05	0.000352666	0.000256019	832	tags=29%, list=8%, signal=27%	9232/9133/7027/1870/891/9978/7029/1031/991/890/5111/983/7533/9134/699/8900/51343/7272/6500/1869/7465/1111/4173/4176/1647/4175/990/4085/996
KEGG CELL ADHESION MOLECULES CAMS	KEGG CELL ADHESION MOLECULES CAMS	KEGG细胞粘附分子CAMS	84	-0.498264	-1.95344	5.47816e-05	0.000529556	0.000384433	1808	tags=36%, list=18%, signal=30%	3107/3684/933/50848/3119/3689/3384/3133/5788/6402/3695/2734/5175/3109/923/6404/3683/3134/3122/3127/926/3108/3117/1462/3125/3115/3113/3123/925/914
KEGG SPLICEOSOME	KEGG SPLICEOSOME	KEGG剪接体	107	-0.453993	-1.84358	7.65699e-05	0.000686713	0.000498521	3659	tags=59%, list=36%, signal=38%	10915/51729/3190/144983/3303/57461/6629/10713/57819/5356/9879/4670/988/151903/11325/9343/6627/3304/51362/10285/57187/1665/10286/3178/10569/9984/3183/26121/27339/9416/3305/1659/22938/10450/9128/3312/3192/24148/22985/29896/27316/23451/10291/10946/55119/11338/51340/9129/220988/55696/6625/9092/58517/22827/7307/55660/9716/1655/10992/10594/23020/8449/3310
KEGG PORPHYRIN AND CHLOROPHYLL METABOLISM	KEGG PORPHYRIN AND CHLOROPHYLL METABOLISM	KEGG卟啉和叶绿素代谢	19	0.744564	2.16903	7.89325e-05	0.000686713	0.000498521	656	tags=47%, list=6%, signal=44%	2235/3145/212/7389/5498/645/7390/210/1371
KEGG ERBB SIGNALING PATHWAY	KEGG ERBB SIGNALING PATHWAY	KEGG ERBB信号通路	71	-0.474262	-1.79741	0.000344426	0.00285382	0.00207174	2177	tags=39%, list=21%, signal=31%	5595/5335/817/2885/207/6654/1027/4690/5295/5293/5062/1398/867/23533/6655/2932/818/6776/5294/27/5579/5058/5336/4609/6777/5894/868/7039
KEGG FC EPSILON RI SIGNALING PATHWAY	KEGG FC EPSILON RI SIGNALING PATHWAY	KEGG FC EPSILON RI信号通路	58	-0.499525	-1.8162	0.000413243	0.00326837	0.00237268	2541	tags=50%, list=25%, signal=38%	5608/2207/5880/8681/5595/5335/2885/695/207/6654/5295/5293/5170/27040/23533/6655/5580/1432/4067/3937/5294/10451/5579/5336/5894/7409/9846/2205/2534
KEGG LEUKOCYTE TRANSENDOTHELIAL MIGRATION	KEGG LEUKOCYTE TRANSENDOTHELIAL MIGRATION	KEGG白细胞跨上皮迁移	80	-0.440325	-1.70987	0.00129073	0.00976469	0.0070887	2404	tags=41%, list=24%, signal=32%	7852/5880/83593/3383/1535/399/5335/5295/3684/50848/5293/4478/653361/87/3689/2773/4688/4689/23533/5175/1432/5294/7408/10451/5579/9475/5336/3683/7409/6494/5829/7294/3702
KEGG RIG I LIKE RECEPTOR SIGNALING PATHWAY	KEGG RIG I LIKE RECEPTOR SIGNALING PATHWAY	我喜欢受体信号通路	45	-0.514094	-1.76556	0.00135161	0.00979918	0.00711374	3371	tags=53%, list=33%, signal=36%	79132/5603/8737/1147/29110/1540/4792/80143/6885/9755/8653/5970/7189/3551/4790/9140/841/3665/23586/4214/1432/7706/64135/54941
KEGG GLYCINE SERINE AND THREONINE METABOLISM	KEGG GLYCINE SERINE AND THREONINE METABOLISM	KEGG甘氨酸、丝氨酸和苏氨酸代谢	19	0.661834	1.92802	0.00162616	0.011318	0.00821636	1281	tags=42%, list=13%, signal=37%	212/4128/29968/26227/23464/55349/4129/27232
KEGG FC GAMMA R MEDIATED PHAGOCYTOSIS	KEGG FC GAMMA R MEDIATED PHAGOCYTOSIS	KEGG FC R介导的吞噬作用	83	-0.434215	-1.70002	0.0017383	0.0116332	0.00844517	2177	tags=39%, list=21%, signal=31%	5595/4082/5335/382/207/5295/5293/50807/653361/2212/1398/1794/27040/5788/23533/5580/3055/2209/4067/3985/5294/7408/10451/5579/8396/5058/5336/2213/5894/7409/9846/2214
KEGG INTESTINAL IMMUNE NETWORK FOR IGA PRODUCTION	KEGG INTESTINAL IMMUNE NETWORK FOR IGA PRODUCTION	KEGG肠道免疫网络生产IGA	34	-0.554963	-1.79223	0.00193447	0.0117112	0.00850178	909	tags=32%, list=9%, signal=30%	3695/3109/3122/3127/3108/3117/10673/3125/3115/3113/3123
KEGG VEGF SIGNALING PATHWAY	KEGG VEGF SIGNALING PATHWAY	KEGG VEGF信号通路	55	-0.480173	-1.72851	0.00194728	0.0117112	0.00850178	2384	tags=40%, list=23%, signal=31%	5743/5880/8681/5595/5335/207/5295/4772/5293/23533/10725/5530/1432/5294/5533/5579/5336/5894/5829/4775/9047/4773
KEGG NOD LIKE RECEPTOR SIGNALING PATHWAY	KEGG NOD LIKE RECEPTOR SIGNALING PATHWAY	KEGG NOD类受体信号通路	49	-0.492166	-1.72629	0.00195187	0.0117112	0.00850178	1714	tags=53%, list=17%, signal=44%	64127/5603/1147/64170/4792/84674/4210/6885/5595/5970/7189/29108/3551/4790/114548/841/330/1432/22900/331/22861/834/4671/6352/3553/838
KEGG PYRIMIDINE METABOLISM	KEGG PYRIMIDINE METABOLISM	KEGG嘧啶代谢	80	0.412778	1.70614	0.00286633	0.0164602	0.0119493	1212	tags=22%, list=12%, signal=20%	7298/4860/6241/7083/51082/4833/56953/1633/129607/5426/1854/5440/661/6240/377841/957/10587/4830
KEGG MAPK SIGNALING PATHWAY	KEGG MAPK SIGNALING PATHWAY	KEGG MAPK信号通路	182	-0.3464	-1.5046	0.00294321	0.0164602	0.0119493	2399	tags=32%, list=24%, signal=25%	4296/6885/5880/409/8681/1843/5595/7040/3305/5971/2885/3312/207/6654/2353/5970/57551/115727/7189/773/5062/4216/3551/1848/8569/4790/1844/1398/9252/7048/6195/4215/5567/408/6655/51347/7132/10746/5530/4208/4214/4217/1432/5533/5579/6197/22800/9448/5058/5922/6789/4609/10235/929/5894/10125/3310/3553/4773
KEGG ECM RECEPTOR INTERACTION	KEGG ECM RECEPTOR INTERACTION	KEGG ECM受体相互作用	39	0.538041	1.92143	0.0030679	0.0164602	0.0119493	1486	tags=49%, list=15%, signal=42%	3161/2815/2811/3674/7057/2812/51206/3693/3690/1293/7450/8515/3679/3691/22798/1288/3918/3911/1302
KEGG ASTHMA	KEGG ASTHMA	KEGG哮喘	20	-0.616222	-1.76938	0.00312176	0.0164602	0.0119493	624	tags=50%, list=6%, signal=47%	3109/2205/3122/3127/3108/3117/3125/3115/3113/3123
KEGG ARGININE AND PROLINE METABOLISM	KEGG ARGININE AND PROLINE METABOLISM	KEGG精氨酸和脯氨酸代谢	34	0.533488	1.8275	0.0041688	0.0213345	0.0154878	1153	tags=35%, list=11%, signal=31%	4128/4953/383/384/1159/5625/2752/217/2747/1152/4129/8659
KEGG EPITHELIAL CELL SIGNALING IN HELICOBACTER PYLORI INFECTION	KEGG EPITHELIAL CELL SIGNALING IN HELICOBACTER PYLORI INFECTION	KEGG上皮细胞信号在幽门螺杆菌感染中的作用	54	-0.458836	-1.64342	0.0055139	0.027412	0.0198998	2202	tags=39%, list=22%, signal=31%	533/8992/5335/9114/5970/50848/526/528/3551/6868/4790/10312/1432/4067/523/5058/5336/1445/3577/3579/6352
KEGG CHRONIC MYELOID LEUKEMIA	KEGG CHRONIC MYELOID LEUKEMIA	慢性骨髓性白血病	64	-0.42383	-1.56254	0.00827949	0.0400175	0.0290509	2177	tags=42%, list=21%, signal=33%	5595/7040/2885/207/6654/1871/1027/5295/5970/1487/5293/3551/4790/1398/7048/867/23533/6655/6776/5294/1488/4088/4609/6777/5894/9846/868
KEGG CYTOSOLIC DNA SENSING PATHWAY	KEGG CYTOSOLIC DNA SENSING PATHWAY	KEGG胞质DNA传感通路	34	-0.514201	-1.66059	0.0101785	0.0478663	0.0347487	1952	tags=44%, list=19%, signal=36%	84265/5970/11277/103/29108/3551/4790/3665/23586/81030/9447/834/6352/3553/6351
KEGG NEUROTROPHIN SIGNALING PATHWAY	KEGG NEUROTROPHIN SIGNALING PATHWAY	KEGG神经营养蛋白信号通路	107	-0.365554	-1.48445	0.0105932	0.0485056	0.0352128	2177	tags=35%, list=21%, signal=27%	5595/9500/10971/5335/817/2885/5663/2889/57498/207/6654/5295/5970/7189/5293/5170/11108/3551/4790/1398/9252/6195/4215/23533/7529/6655/2932/818/5580/4214/4217/1432/5294/6197/5336/5894/1445
KEGG ENDOCYTOSIS	KEGG ENDOCYTOSIS	KEGG内吞作用	144	-0.345621	-1.45743	0.0109683	0.0489355	0.0355249	2462	tags=38%, list=24%, signal=29%	60682/83737/7852/25978/9135/2869/409/10617/84364/3305/1213/382/3312/3107/23527/29082/11311/64744/10254/7189/11059/50807/116984/30844/84440/154/51100/23550/867/3133/10015/3480/408/3561/57132/5590/79720/9922/80223/9101/9815/1234/8396/9744/3134/30011/868/64411/116985/3577/3310/64750/3579/3560
